# Supplementary figures and images for: Prognostic impact of p16 and PD-L1 expression in patients with oropharyngeal squamous cell carcinoma receiving a definitive treatment
Source: PubMed Central journal article supplement — J Clin Pathol. 2019 May 21;72(8):542–9. doi: 10.1136/jclinpath-2019-205818 (PMC6678043; doi:10.1136/jclinpath-2019-205818), 2019-05-21

— : p16 positive  
 — : p16 negative

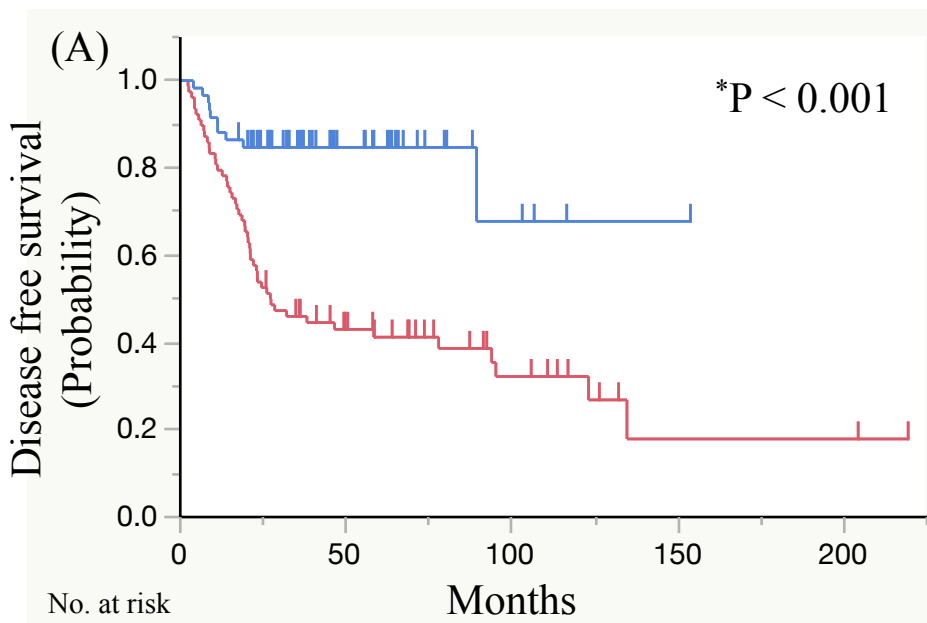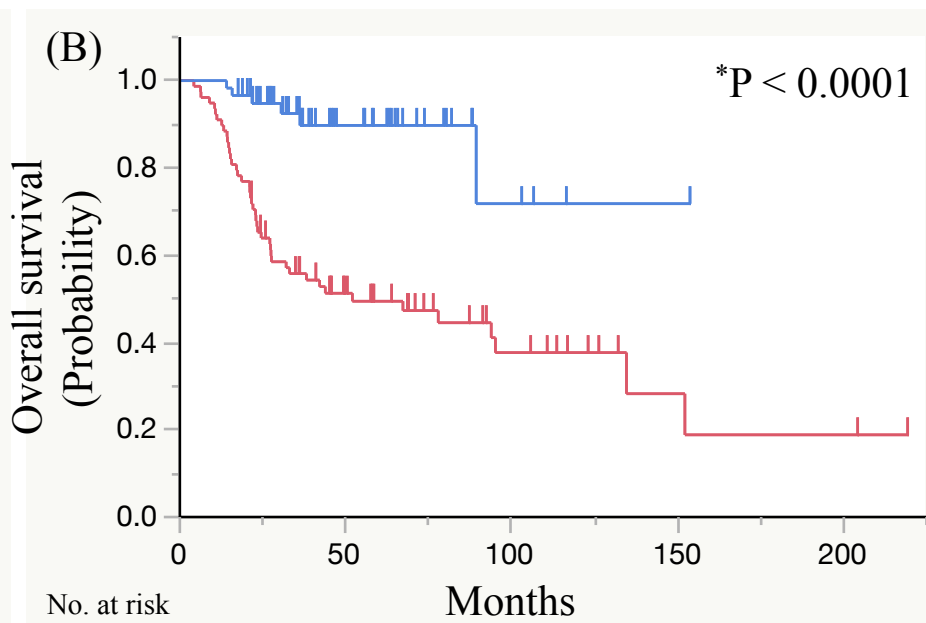

|   |    |    |    |   |   |
|---|----|----|----|---|---|
| + | 59 | 21 | 4  | 1 | 0 |
| - | 78 | 26 | 10 | 2 | 2 |

|   |    |    |    |   |   |
|---|----|----|----|---|---|
| + | 59 | 23 | 4  | 1 | 0 |
| - | 78 | 29 | 11 | 3 | 2 |

Supplement figure. 1

— : IC-PD-L1 positive  
 — : IC-PD-L1 negative

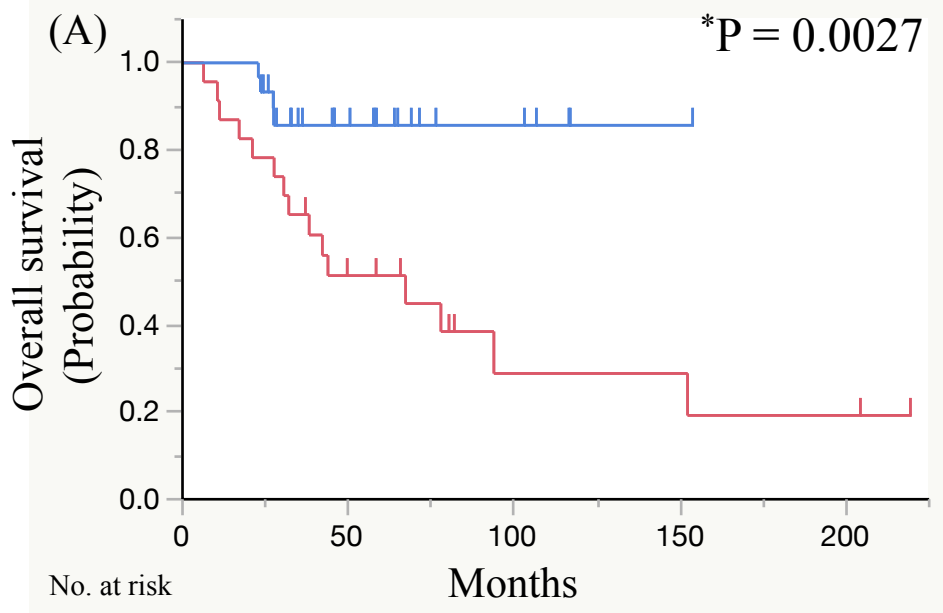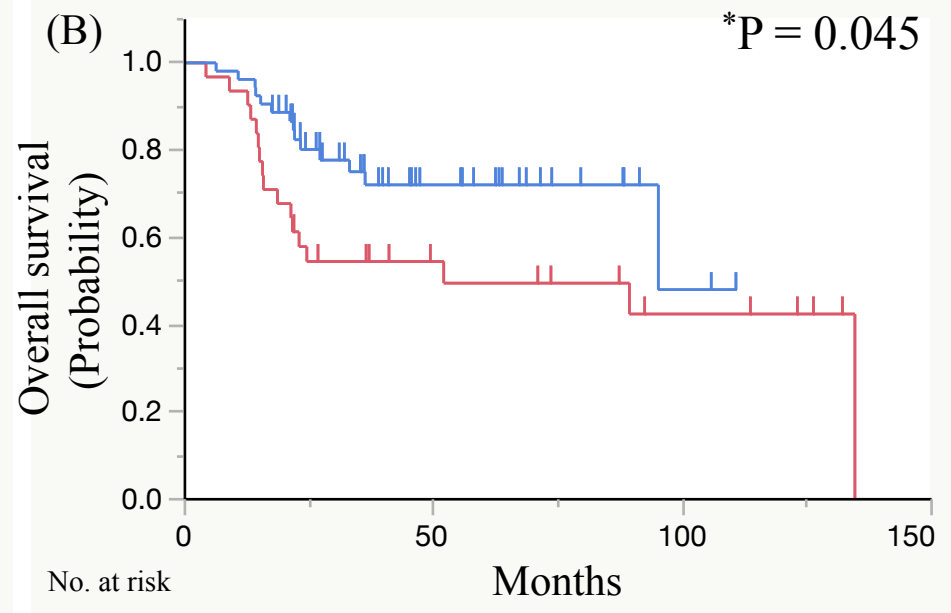

Supplement figure. 2

Supplement: jclinpath-2019-205818supp001.pdf [file jclinpath-2019-205818supp001.pdf]
